# Supplementary material
Source: publisher figshare collection journal article supplement (https://acs.figshare.com/ndownloader/files/4764820)
Supplement: Supplementary file 1 [file 4764820]

**Table 3:** Average values for pH, suspended solids and turbidity within the two runoff water microcosm treatments

| Treatment     | Start pH | Suspended solids<br>(mg L <sup>-1</sup> ) | Turbidity<br>(FTU) |
|---------------|----------|-------------------------------------------|--------------------|
| Water         | 6.55     | 10                                        | 11                 |
| Water + feces | 7.12     | 123                                       | 123                |

**Table 4:** Modeled parameters and values associated with runoff water microcosm treatments

| Treatment       | R    |      | <i>k</i><br>(days <sup>-1</sup> ) |      | Half<br>(days) |      | B<br>(log <sub>10</sub> CFU mL <sup>-1</sup> ) |      | A<br>(log <sub>10</sub> CFU mL <sup>-1</sup> ) |      |
|-----------------|------|------|-----------------------------------|------|----------------|------|------------------------------------------------|------|------------------------------------------------|------|
|                 | Mean | SE   | Mean                              | SE   | Mean           | SE   | Mean                                           | SE   | Mean                                           | SE   |
| 1 Water         | 0.81 | 0.02 | 0.19                              | 0.02 | 3.75           | 0.43 | 7.77                                           | 0.53 | -0.64                                          | 0.56 |
| 2 Water + feces | 0.72 | 0.02 | 0.33                              | 0.03 | 2.15           | 0.15 | 5.70                                           | 0.31 | 1.49                                           | 0.30 |

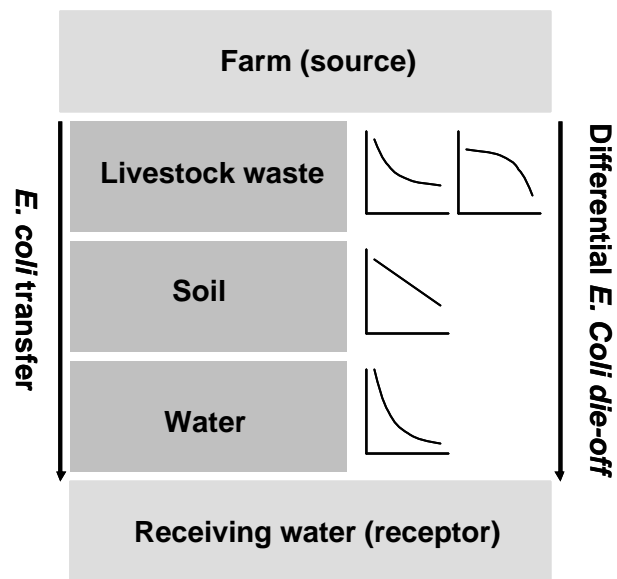

**Figure 4:** Conceptualized patterns of die-off associated with *E. coli* during transfer through the farm environment; the 'die-off transect'.
